# Supplementary material for: Detecting Hypoglycemia Incidents Reported in Patients’ Secure Messages: Using Cost-Sensitive Learning and Oversampling to Reduce Data Imbalance
Source: PubMed Central journal article supplement (PMC6431826; doi:10.2196/11990), 2019-03-11
Supplement: jmir_v21i3e11990_app3.pdf [file jmir_v21i3e11990_app3.pdf]

### Multimedia Appendix 3: Supplemental information about features used in this study

Table A3-1. Example topics generated by topic modeling.

| Topic id | Topics                     | Keywords                                                                                                                                                                                                                                                |
|----------|----------------------------|---------------------------------------------------------------------------------------------------------------------------------------------------------------------------------------------------------------------------------------------------------|
| 10       | Diet/food                  | cheese cup chicken salad lunch toast breakfast coffee oz sandwich oatmeal calories butter dinner milk protein fiber egg eggs rice bread carbs beef raisins fruit peanut total large turkey potato                                                       |
| 12       | Other disease and symptoms | infection ear throat antibiotic coughing antibiotics nose sinus days nasal ER spray clear cold allergy prescribed sore bad prednisone temp ears urinary infections dry sinuses congestion worse wheezing yellow finished                                |
| 15       | Other disease and symptoms | kidney disease renal liver joint dialysis acute damage evidence transplant degenerative treat stones stone narrowing shows joints potential post chondrocalcinosis inflammation findings kidneys present include moderate affected gene NSAIDs fracture |
| 24       | Appointment and referral   | consult Dr. clinic appt appointment referral request therapy general put pt schedule make urology call evaluation issues place appts podiatry park heard dermatology requested told ortho order choice neuro pulmonary                                  |
| 37       | Blood sugar measurement    | sugar readings day morning reading low high eating insulin taking night evening eat hours glucose fasting general levels breakfast meal units average dinner metformin range pm lunch meals numbers running                                             |
| 40       | Inquiry                    | message secure send messaging call questions Mr. clinical contact pharmacy free clinic feel email specialist phone reply pharmacist pharmd concerns Ms. messages center information sincerely telephone forward response office number                  |

|    |                                             |                                                                                                                                                                                                                                      |
|----|---------------------------------------------|--------------------------------------------------------------------------------------------------------------------------------------------------------------------------------------------------------------------------------------|
| 49 | Warning symptoms (e.g., dizzy, weak, tired) | feel feeling night sugar felt morning dizzy low bed started inquiry day bad water yesterday checked tired pm woke resting weak wake eat hours BP                                                                                     |
| 54 | Cancer                                      | cancer prostate risk bd bb biopsy bl bladder increased radiation urology linked based evaluation lung chemo removed bleeding cardiovascular benign treatments tissue possibly breast psa enlarged inflammation urologist bt oncology |
| 67 | Diabetes medications                        | metformin mg glipizide sugar taking daily day diabetes Dr inquiry increase start Victoza sugars morning visit results fasting continue dosage insulin started Saxagliptin tablets glyburide control increased pill advise high       |
| 72 | Activity                                    | walk walking time minutes inquiry times bed sitting long exercise home standing fall shower sit miles move chair due lost hours fine unable car finally stand driving routine rest scale                                             |

Table A3-2. Keywords used to generate domain-relevance features.

| Topic No. | Keywords                                                                           |
|-----------|------------------------------------------------------------------------------------|
| 1         | blur, confused, dizzy, headache, hungry, pale, shake, shaking, sleepy, sweat, weak |
| 2         | dose, doses                                                                        |
| 3         | drop, down, low, decrease, below, lower, lowest, decreased                         |
| 4         | glucose, sugar                                                                     |
| 5         | hypoglycemia, hypoglycemic                                                         |
| 6         | increase, above, over, highest, high, higher, increased                            |
| 7         | episode, episodes                                                                  |
| 8         | incident, incidents                                                                |
