# Supplementary material for: Detecting Hypoglycemia Incidents Reported in Patients’ Secure Messages: Using Cost-Sensitive Learning and Oversampling to Reduce Data Imbalance
Source: PubMed Central journal article supplement (PMC6431826; doi:10.2196/11990), 2019-03-11
Supplement: jmir_v21i3e11990_app4.pdf [file jmir_v21i3e11990_app4.pdf]

#### Multimedia Appendix 4: Keywords used by the rule-based method

| Symptom Category No. | Keywords                                                                         |
|----------------------|----------------------------------------------------------------------------------|
| 1                    | blur                                                                             |
| 2                    | confused, confusion                                                              |
| 3                    | dizzy, dizziness, light headedness, light headed, light-headed, light-headedness |
| 4                    | shaking, shake                                                                   |
| 5                    | sweat                                                                            |
| 6                    | weak, weakness                                                                   |
| 7                    | hunger, hungry                                                                   |
| 8                    | nervousness, anxiety                                                             |
| 9                    | sleepiness                                                                       |
| 10                   | difficulty speaking                                                              |
| 11                   | loss of consciousness                                                            |
