# Supplementary material for: Detecting Hypoglycemia Incidents Reported in Patients’ Secure Messages: Using Cost-Sensitive Learning and Oversampling to Reduce Data Imbalance
Source: PubMed Central journal article supplement (PMC6431826; doi:10.2196/11990), 2019-03-11
Supplement: jmir_v21i3e11990_app5.pdf [file jmir_v21i3e11990_app5.pdf]

## Multimedia Appendix 5: Supplemental results from this study

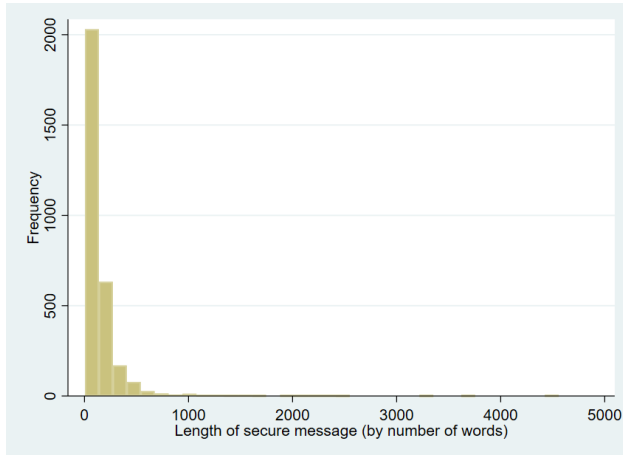

Figure A5-1. Distribution of the length of secure messages. 3000 messages in total, with a median length of 92 (interquartile range=(49, 168)). 2850 (95%) of the 3000 messages had fewer than 435 words.

Table A5-1. Performance of three variants of HypoDetect systems on the evaluation set, averaged by folds in 10-fold cross-validation.

| Systems                           | AUC_<br>ROC      | Precision        | Sensitivity<br>(Recall) | Specificity      | F1               | Accuracy         |
|-----------------------------------|------------------|------------------|-------------------------|------------------|------------------|------------------|
| <b>Rule-based</b>                 | 0.815<br>(0.068) | 0.288<br>(0.090) | 0.493<br>(0.160)        | 0.951<br>(0.010) | 0.363<br>(0.113) | 0.934<br>(0.014) |
| <b>Linear SVMs</b>                |                  |                  |                         |                  |                  |                  |
| <b>Baseline</b>                   | 0.944<br>(0.038) | 0.629<br>(0.218) | 0.378<br>(0.137)        | 0.991<br>(0.006) | 0.462<br>(0.151) | 0.967<br>(0.008) |
| <b>Class weighting</b>            | 0.951<br>(0.034) | 0.551<br>(0.154) | 0.566<br>(0.154)        | 0.980<br>(0.010) | 0.544<br>(0.118) | 0.964<br>(0.010) |
| <b>RUS-ensemble<sup>a</sup></b>   | 0.949<br>(0.039) | 0.199<br>(0.028) | 0.921<br>(0.110)        | 0.852<br>(0.013) | 0.326<br>(0.043) | 0.855<br>(0.015) |
| <b>ROS-ensemble<sup>b</sup></b>   | 0.949<br>(0.035) | 0.570<br>(0.160) | 0.503<br>(0.156)        | 0.984<br>(0.007) | 0.523<br>(0.135) | 0.966<br>(0.009) |
| <b>SMOTE-ensemble<sup>c</sup></b> | 0.950<br>(0.035) | 0.573<br>(0.158) | 0.503<br>(0.156)        | 0.985<br>(0.007) | 0.525<br>(0.135) | 0.966<br>(0.008) |
| <b>Random Forest</b>              |                  |                  |                         |                  |                  |                  |

|                            |                        |                  |                  |                  |                  |                  |                  |
|----------------------------|------------------------|------------------|------------------|------------------|------------------|------------------|------------------|
|                            | <b>Baseline</b>        | 0.943<br>(0.031) | 0.000 (0)        | 0.000 (0)        | 1.000 (0)        | 0.000 (0)        | 0.962<br>(0.002) |
|                            | <b>Class weighting</b> | 0.927<br>(0.058) | 0.435<br>(0.133) | 0.574<br>(0.180) | 0.970<br>(0.010) | 0.490<br>(0.140) | 0.955<br>(0.013) |
|                            | <b>RUS-ensemble</b>    | 0.929<br>(0.046) | 0.145<br>(0.022) | 0.905<br>(0.109) | 0.787<br>(0.024) | 0.249<br>(0.036) | 0.791<br>(0.024) |
|                            | <b>ROS-ensemble</b>    | 0.932<br>(0.046) | 0.321<br>(0.080) | 0.733<br>(0.188) | 0.938<br>(0.012) | 0.444<br>(0.105) | 0.930<br>(0.015) |
|                            | <b>SMOTE-ensemble</b>  | 0.942<br>(0.042) | 0.490<br>(0.113) | 0.600<br>(0.144) | 0.975<br>(0.007) | 0.535<br>(0.120) | 0.961<br>(0.010) |
| <b>Logistic Regression</b> |                        |                  |                  |                  |                  |                  |                  |
|                            | <b>Baseline</b>        | 0.952<br>(0.037) | 0.673<br>(0.267) | 0.310<br>(0.138) | 0.994<br>(0.005) | 0.415<br>(0.167) | 0.968<br>(0.009) |
|                            | <b>Class weighting</b> | 0.953<br>(0.036) | 0.540<br>(0.151) | 0.696<br>(0.156) | 0.974<br>(0.012) | 0.593<br>(0.117) | 0.963<br>(0.013) |
|                            | <b>RUS-ensemble</b>    | 0.947<br>(0.041) | 0.193<br>(0.029) | 0.913<br>(0.113) | 0.849<br>(0.014) | 0.319<br>(0.044) | 0.851<br>(0.016) |
|                            | <b>ROS-ensemble</b>    | 0.950<br>(0.036) | 0.553<br>(0.171) | 0.528<br>(0.162) | 0.982<br>(0.009) | 0.528<br>(0.139) | 0.965<br>(0.010) |
|                            | <b>SMOTE-ensemble</b>  | 0.951<br>(0.036) | 0.586<br>(0.146) | 0.563<br>(0.145) | 0.983<br>(0.008) | 0.561<br>(0.112) | 0.967<br>(0.008) |

<sup>a</sup>RUS-ensemble: ensemble models using random under-sampling

<sup>b</sup>ROS-ensemble: ensemble models using random over-sampling

<sup>c</sup>SMOTE-ensemble: ensemble models using Synthetic Minority Over-sampling Technique

Table A5-2. Performance comparison between the best HypoDetect systems and other systems, as measured by F1 score. <sup>a</sup>

| System A                    | System B                        |                                  |                                         |
|-----------------------------|---------------------------------|----------------------------------|-----------------------------------------|
|                             | Linear SVMs:<br>class weighting | Random Forest:<br>SMOTE-ensemble | Logistic Regression:<br>class weighting |
| Rule based                  | <i>P</i> < .001                 | <i>P</i> < .001                  | <i>P</i> < .001                         |
| Linear SVMs                 |                                 |                                  |                                         |
| Baseline                    | <i>P</i> = .004                 |                                  |                                         |
| RUS-ensemble <sup>b</sup>   | <i>P</i> < .001                 |                                  |                                         |
| ROS-ensemble <sup>c</sup>   | <i>P</i> = .09                  |                                  |                                         |
| SMOTE-ensemble <sup>d</sup> | <i>P</i> = .1                   |                                  |                                         |
| Random Forest               |                                 |                                  |                                         |
| Baseline                    |                                 | <i>P</i> < .001                  |                                         |
| RUS-ensemble                |                                 | <i>P</i> < .001                  |                                         |

|                     |  |            |            |
|---------------------|--|------------|------------|
| ROS-ensemble        |  | $P < .001$ |            |
| Class weighting     |  | $P = .06$  |            |
|                     |  |            |            |
|                     |  |            |            |
| Logistic Regression |  |            |            |
| Baseline            |  |            | $P = .002$ |
| RUS-ensemble        |  |            | $P < .001$ |
| ROS-ensemble        |  |            | $P = .02$  |
| SMOTE-ensemble      |  |            | $P = .08$  |

<sup>a</sup>one-sided paired t-test. Treating F1 score on each fold as an observation and paired the F1 scores of two systems for the same fold.  $H_0$ : F1 score of system A == F1 score of system B.  $H_a$ : F1 score of system A < F1 score of system B

<sup>b</sup>RUS-ensemble: ensemble models using random under-sampling

<sup>c</sup>ROS-ensemble: ensemble models using random over-sampling

<sup>d</sup>SMOTE-ensemble: ensemble models using Synthetic Minority Over-sampling Technique

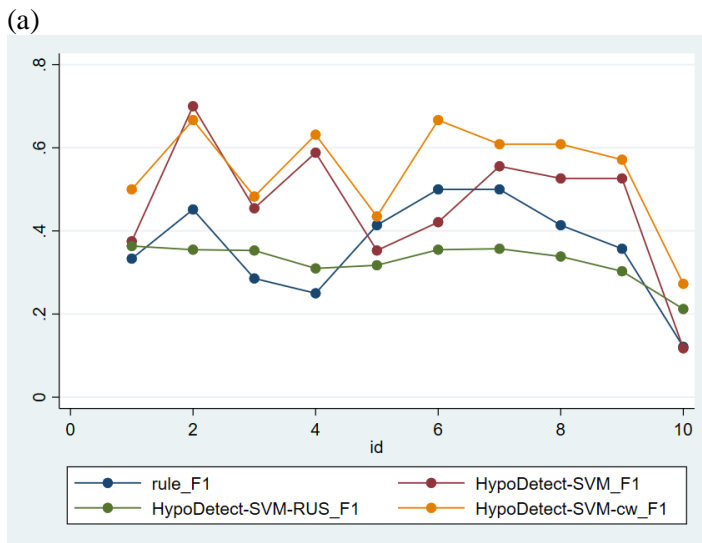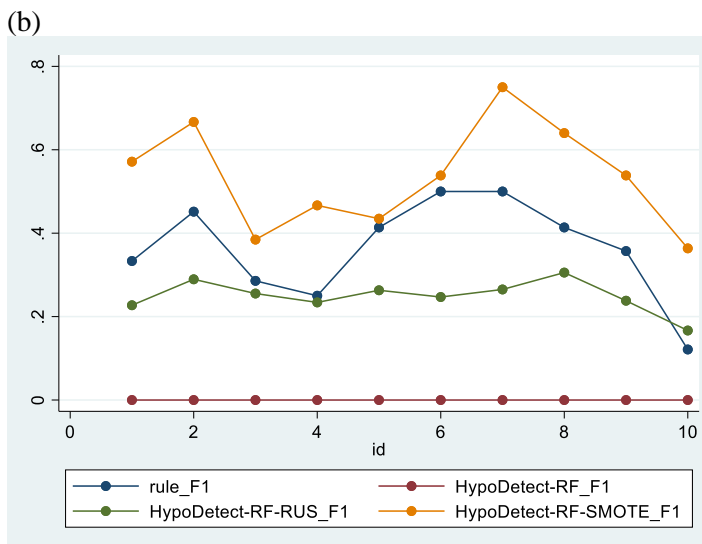

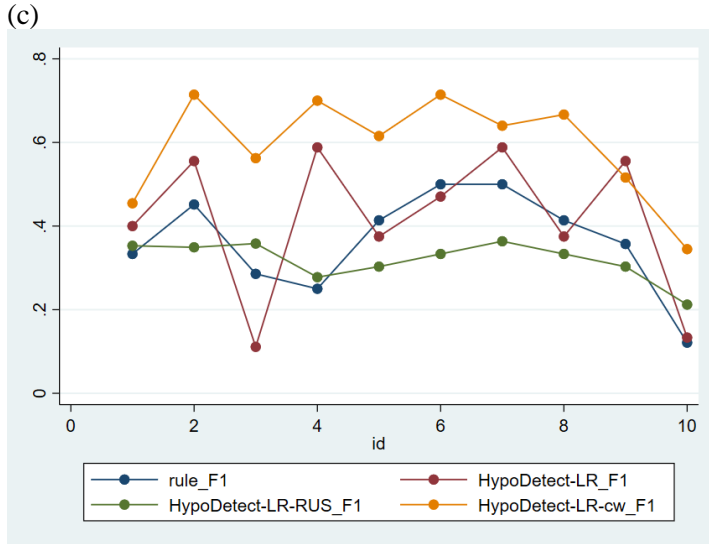

Figure A5-2. Comparing F1 scores of the best HypoDetect system and the baseline systems on each fold. (a): Linear SVMs, (b): Random Forest, and (c): Logistic Regression. Blue (baseline): rule-based method; Red (baseline): machine learning models without treating data imbalance; Green (baseline): ensemble models using random under-sampling (RUS); Orange (best): models using class weighting (cw) or ensemble models using Synthetic Minority Over-sampling Technique (SMOTE).

Table A5-3. Performance of individual classifiers used in ensembled over-sampling HypoDetect systems.

| Performance Metrics         |                  | Linear SVM                |                             | Random Forest    |                  | Logistic Regression |                  |
|-----------------------------|------------------|---------------------------|-----------------------------|------------------|------------------|---------------------|------------------|
|                             |                  | ROS-ensemble <sup>a</sup> | SMOTE-ensemble <sup>b</sup> | ROS-ensemble     | SMOTE-ensemble   | ROS-ensemble        | SMOTE-ensemble   |
| <b>AUC-ROC</b>              |                  |                           |                             |                  |                  |                     |                  |
|                             | <b>Mean (SD)</b> | 0.951<br>(0.000)          | 0.951<br>(0.000)            | 0.930<br>(0.002) | 0.941<br>(0.002) | 0.951<br>(0.000)    | 0.951<br>(0.000) |
|                             | <b>Minimum</b>   | 0.950                     | 0.950                       | 0.927            | 0.938            | 0.951               | 0.951            |
|                             | <b>Maximum</b>   | 0.951                     | 0.951                       | 0.934            | 0.944            | 0.951               | 0.952            |
| <b>Precision</b>            |                  |                           |                             |                  |                  |                     |                  |
|                             | <b>Mean (SD)</b> | 0.560<br>(0.004)          | 0.567<br>(0.004)            | 0.302<br>(0.007) | 0.470<br>(0.016) | 0.541<br>(0.003)    | 0.565<br>(0.006) |
|                             | <b>Minimum</b>   | 0.554                     | 0.560                       | 0.290            | 0.450            | 0.531               | 0.557            |
|                             | <b>Maximum</b>   | 0.564                     | 0.574                       | 0.313            | 0.500            | 0.544               | 0.577            |
| <b>Sensitivity (Recall)</b> |                  |                           |                             |                  |                  |                     |                  |

|                    |                  |                  |                  |                  |                  |                  |                  |
|--------------------|------------------|------------------|------------------|------------------|------------------|------------------|------------------|
|                    | <b>Mean (SD)</b> | 0.502<br>(0.007) | 0.504<br>(0.007) | 0.711<br>(0.008) | 0.601<br>(0.017) | 0.534<br>(0.006) | 0.561<br>(0.000) |
|                    | <b>Minimum</b>   | 0.491            | 0.491            | 0.693            | 0.588            | 0.526            | 0.561            |
|                    | <b>Maximum</b>   | 0.509            | 0.518            | 0.719            | 0.640            | 0.544            | 0.561            |
| <b>Specificity</b> |                  |                  |                  |                  |                  |                  |                  |
|                    | <b>Mean (SD)</b> | 0.984<br>(0.000) | 0.985<br>(0.000) | 0.935<br>(0.002) | 0.973<br>(0.002) | 0.982<br>(0.000) | 0.983<br>(0.000) |
|                    | <b>Minimum</b>   | 0.984            | 0.985            | 0.932            | 0.971            | 0.982            | 0.984            |
|                    | <b>Maximum</b>   | 0.985            | 0.985            | 0.938            | 0.976            | 0.982            | 0.982            |
| <b>F1</b>          |                  |                  |                  |                  |                  |                  |                  |
|                    | <b>Mean (SD)</b> | 0.529<br>(0.005) | 0.533<br>(0.006) | 0.425<br>(0.008) | 0.527<br>(0.014) | 0.538<br>(0.004) | 0.563<br>(0.003) |
|                    | <b>Minimum</b>   | 0.521            | 0.523            | 0.409            | 0.511            | 0.531            | 0.559            |
|                    | <b>Maximum</b>   | 0.535            | 0.544            | 0.436            | 0.548            | 0.544            | 0.569            |
| <b>Accuracy</b>    |                  |                  |                  |                  |                  |                  |                  |
|                    | <b>Mean (SD)</b> | 0.966<br>(0.000) | 0.967<br>(0.000) | 0.927<br>(0.002) | 0.959<br>(0.002) | 0.965<br>(0.000) | 0.967<br>(0.000) |
|                    | <b>Minimum</b>   | 0.966            | 0.966            | 0.924            | 0.957            | 0.965            | 0.966            |
|                    | <b>Maximum</b>   | 0.966            | 0.967            | 0.929            | 0.962            | 0.965            | 0.968            |

<sup>a</sup>ROS-ensemble: ensemble models using random over-sampling

<sup>b</sup>SMOTE-ensemble: ensemble models using Synthetic Minority Over-sampling Technique
